# Supplementary material
Source: Frontiers journal article supplement (https://www.frontiersin.org/articles/416673)
Supplement: Data_Sheet_2.PDF [file Data_Sheet_2.PDF]

## Supplementary material Table 2. Mechanisms of exosomes/exosomal components

which have potential effects on IBD.

| Components              | Function                                                                                                                                                                          | Origins                                     | Effects/Mechanisms                                                                                                                                                                                                                                                                                                                                                                                                | Significance            | Functions of exosome structure                                  | Reference |
|-------------------------|-----------------------------------------------------------------------------------------------------------------------------------------------------------------------------------|---------------------------------------------|-------------------------------------------------------------------------------------------------------------------------------------------------------------------------------------------------------------------------------------------------------------------------------------------------------------------------------------------------------------------------------------------------------------------|-------------------------|-----------------------------------------------------------------|-----------|
| <b>Exosomal lncRNAs</b> |                                                                                                                                                                                   |                                             |                                                                                                                                                                                                                                                                                                                                                                                                                   |                         |                                                                 |           |
| LncRNA GAS5             | Long, non-coding RNA up regulates glucocorticoid in-resistant cells                                                                                                               | —                                           | Promotes apoptosis of macrophages or inhibits glucocorticoids activity                                                                                                                                                                                                                                                                                                                                            | Treatment               | Membrane carrier of high level lncRNA GAS5                      | [1; 2]    |
| <b>Exosomal miRNAs</b>  |                                                                                                                                                                                   |                                             |                                                                                                                                                                                                                                                                                                                                                                                                                   |                         |                                                                 |           |
| MiR155                  | Short RNA molecules binding to specific mRNAs to regulate protein production or cause RNA cleavage; Stimulates endothelium barrier dysfunction and intestinal inflammation in IBD | Macrophages, DCs, KLF5-overexpressing VSMCs | Deficiency of exosomal miR155 may ameliorate intestinal inflammation by suppressing the development and function of CD103+CD11b+DC in the lamina propria of intestine in IBD; KLF5-overexpressing VSMCs-derived exosomes loaded with miRNA155 can transport into ECs to modulate endothelium barrier dysfunction through downregulation of TJ protein expression and disruption of this process may alleviate IBD | Treatment               | As a paracrine messenger to mediate the cell-cell communication | [3; 4; 5] |
| MiR146b                 | Up regulates NF-κB to accelerate IBD inflammation                                                                                                                                 | DCs                                         | Aggravates intestinal inflammation by up regulating NF-κB and deficiency of it may ameliorate IBD course                                                                                                                                                                                                                                                                                                          | Treatment               | Membrane carrier                                                | [6; 7]    |
| MiR1246                 | Activates macrophages and T cells to aggravate IBD inflammation                                                                                                                   | Detected in sera                            | Suppresses the anti-inflammation by reprogramming macrophages or activates the proinflammatory nuclear factor of activated T cells, and may contribute to the effective indication as a biomarker of active IBD                                                                                                                                                                                                   | Treatment/<br>Diagnosis | Drives macrophage reprogramming                                 | [8; 9]    |
| MiR16                   | Activates NF-κB signaling pathway to accelerate UC                                                                                                                                | Detected in human milk                      | Inhibition of adenosine A2a receptor expression to activate NF-κB signaling pathway in UC                                                                                                                                                                                                                                                                                                                         | Treatment               | Able to survive digestion and being taken up by enterocytes     | [10; 11]  |
| MiR29b                  | Up regulates in active UC                                                                                                                                                         | Detected in bovine milk                     | Accumulated and transported by colon cells in IBD; Up regulates in active UC                                                                                                                                                                                                                                                                                                                                      | Treatment               | Able to survive digestion and being accumulated and             | [12; 13]  |

|         |                                                                                                         |                              |                                                                                                                                                                                                                                         |           |  |                                                                                                                                                              |          |
|---------|---------------------------------------------------------------------------------------------------------|------------------------------|-----------------------------------------------------------------------------------------------------------------------------------------------------------------------------------------------------------------------------------------|-----------|--|--------------------------------------------------------------------------------------------------------------------------------------------------------------|----------|
|         |                                                                                                         |                              |                                                                                                                                                                                                                                         |           |  | transported by intestinal mucosal cells to peripheral tissues                                                                                                |          |
| MiR200c | Up regulates in IBD                                                                                     | Detected in bovine milk      | Up regulates and affects gasotransmitter pathways in IBD                                                                                                                                                                                | Treatment |  | Able to survive digestion and being transported by intestinal mucosal cells to across the basolateral membrane for subsequent delivery to peripheral tissues | [12; 14] |
| MiR223  | Activates NLRP3 inflammasome and facilitates the release of IL-1 $\beta$ and IL-18 to alleviate colitis | Thrombin-activated platelets | Down regulates MAPK and NF- $\kappa$ B pathway to inhibit ICAM-1 expression in inflammation; Exosomal miR223 may regulate the activation of the NLRP3 inflammasome and the release of IL-1 $\beta$ and IL-18 to attenuate early colitis | Treatment |  | Membrane carrier                                                                                                                                             | [15; 16] |
| MiR22   | Up regulates in CD                                                                                      | Detected in human milk       | Stimulates CD progress                                                                                                                                                                                                                  | Diagnosis |  | Able to survive digestion and being taken up by enterocytes                                                                                                  | [13; 17] |
| MiR375  | Up regulates in active CD                                                                               | Detected in serum            | Stimulates active CD progress                                                                                                                                                                                                           | Diagnosis |  | Provides stability for cell-free miR375 in various bodily fluids                                                                                             | [13; 18] |
| MiR150  | Down regulates c-Myb and Bcl-2 to induce colonic EC apoptosis in active IBD                             | IEC-6                        | Down regulates c-Myb and Bcl-2 expression to induce colonic EC apoptosis in active IBD and deficiency of it may contribute to IBD therapy                                                                                               | Treatment |  | —                                                                                                                                                            | [19; 20] |

#### Exosomal proteins

|                     |                                                                                                 |                          |                                                                                                                                                         |           |                  |          |
|---------------------|-------------------------------------------------------------------------------------------------|--------------------------|---------------------------------------------------------------------------------------------------------------------------------------------------------|-----------|------------------|----------|
| ANXA2               | A protein facilitates phagocytosis of apoptotic ECs                                             | —                        | Exosomal Annexin A2 activation enhances phagocytosis of apoptotic ECs, while its inhibition may prevent membrane-anchored TNF- $\alpha$ shedding in IBD | Treatment | Membrane carrier | [21; 22] |
| Ubiquitinated HLA-G | Secreted soluble molecules belonging to the non-classical HLA class I family; Expresses only on | HLA-G1-transfected cells | Modulates immune-regulatory tolerance, the secretion of IL-10 in response to inflammation and the mucosal immunity in UC                                | Treatment | Membrane carrier | [23; 24] |

|                                        |                                                                                                     |                      |                                                                                                                                                                                   |                         |                                     |              |  |
|----------------------------------------|-----------------------------------------------------------------------------------------------------|----------------------|-----------------------------------------------------------------------------------------------------------------------------------------------------------------------------------|-------------------------|-------------------------------------|--------------|--|
|                                        | maternal–fetal interface and immune privileged adult tissues                                        |                      |                                                                                                                                                                                   |                         |                                     |              |  |
| S100A8                                 | A pro-inflammatory protein increased in serum and mucosa of IBD children                            | MDSC                 | Potential new biomarker in IBD diagnosis or regulates T cell responses                                                                                                            | Treatment/<br>Diagnosis | Membrane carrier                    | [25; 26]     |  |
| S100A9                                 | A pro-inflammatory protein increased in serum and mucosa of IBD children                            | MDSC                 | Facilitates UC by activating STAT3 or T cell responses and down regulation of it may contribute to IBD therapy                                                                    | Treatment               | Membrane carrier                    | [25; 26]     |  |
| TG2                                    | A functional enzyme increased in IBD                                                                | TG2 proficient cells | Inhibition of exosomal TG2 may contribute to IBD treatment                                                                                                                        | Treatment               | Membrane carrier                    | [27; 28]     |  |
| Complement C3                          | An inflammatory protein                                                                             | Intestinal lymph     | Potential autoantigen in IBD                                                                                                                                                      | Diagnosis               | Membrane carrier                    | [29; 30; 31] |  |
| Complement C5                          | Aggravates colitis by up regulating the mucosal expression of TNF- $\alpha$ , IL-1 $\beta$ and IL-6 | Intestinal lymph     | Inhibition of exosomal complement component C5 may ameliorate colitis by reducing the mucosal expression of TNF- $\alpha$ , IL-1 $\beta$ and IL-6                                 | Treatment               | Membrane carrier                    | [29; 30; 31] |  |
| Fibronectin                            | Induces colitis                                                                                     | Intestinal lymph     | Induces colitis mediated by integrin-linked kinase                                                                                                                                | Diagnosis               | Membrane carrier                    | [32; 33]     |  |
| Plasminogen                            | Increased in UC                                                                                     | Intestinal lymph     | Indicates clinical activity of UC                                                                                                                                                 | Diagnosis               | Membrane carrier                    | [34; 35]     |  |
| Thymic stromal lymphopoietin           | Products of harmless antigens                                                                       | IEC                  | Involves in the conditioning of DCs in IBD                                                                                                                                        | Treatment               | Membrane carrier                    | [36]         |  |
| Integrin $\alpha\text{v}\beta\text{6}$ | Involving in the tolerogenic DC conditioning.                                                       | IEC                  | Increased expression of TGF- $\beta$ in DC conditioning and Treg cell induction in IBD                                                                                            | Treatment               | Membrane carrier                    | [36]         |  |
| Beta-defensin 2                        | Anti-microbial peptides                                                                             | IEC apical side      | Exosomes from IEC apical side may be stimulated by protozoan parasite <i>Cryptosporidium parvum</i> to produce and secret in the luminal through the activation of TLR4 signaling | Treatment               | Membrane carrier                    | [36]         |  |
| Cathelicidin-37                        | Anti-microbial peptides                                                                             | IEC apical side      | Exosomes from IEC apical side may be stimulated by protozoan parasite <i>Cryptosporidium parvum</i> to produce and secret in the luminal through the activation of TLR4 signaling | Treatment               | Membrane carrier                    | [36]         |  |
| GRP78                                  | As an endoplasmic reticulum stress marker                                                           | Unclear              | Maintains normal colonic epithelium function in IBD                                                                                                                               | Treatment               | As a paracrine messenger to mediate | [37; 38]     |  |

|                                                      |                                                                                                                                                        |                  |                                                                                                                                          |                         |                                                           |              |
|------------------------------------------------------|--------------------------------------------------------------------------------------------------------------------------------------------------------|------------------|------------------------------------------------------------------------------------------------------------------------------------------|-------------------------|-----------------------------------------------------------|--------------|
|                                                      | protein to maintain normal colonic epithelium function in IBD                                                                                          |                  |                                                                                                                                          |                         | the cell-cell communication, or as a biomarker of disease |              |
| PrPC                                                 | A glycosylphosphatidylinositol-anchored glycoprotein located in cell–cell junctions and interacts with desmosome proteins in the intestinal epithelium | Platelet         | Regulates TJ barrier function in both UC and CD                                                                                          | Treatment               | Membrane carrier                                          | [39; 40]     |
| Peroxisome proliferator-activated receptor- $\gamma$ | A nuclear receptor regulates differentiation and proliferation of adipocyte, and functions of immune cells as well as inflammatory cells               | Human plasma     | Contributes to the paracrine transfer of nuclear receptors in IBD, especially UC and down regulation of it may contribute to IBD therapy | Treatment               | Membrane carrier                                          | [41; 42]     |
| Albumin                                              | Mediated by TNF to induce IBD                                                                                                                          | Intestinal lymph | Mediated by TNF to induce IBD and downregulation of it may contribute to IBD therapy                                                     | Treatment               | Membrane carrier                                          | [29; 30; 31] |
| HSP70 protein family (including HSP72 and HSP73)     | Regulates lymphocyte activity and cytokine production                                                                                                  | —                | Exosomal HSP70 protein may regulate lymphocyte activity and cytokine production; HSP72 may regulate intestinal microbiota profile        | Diagnosis/<br>Treatment | —                                                         | [43; 44]     |

### Special contents

|                                               |                                                                                                                                                                                                                                                      |                   |                                                                                                                                                                  |           |                                                                                |      |
|-----------------------------------------------|------------------------------------------------------------------------------------------------------------------------------------------------------------------------------------------------------------------------------------------------------|-------------------|------------------------------------------------------------------------------------------------------------------------------------------------------------------|-----------|--------------------------------------------------------------------------------|------|
| Sphingosine-1-phosphate, CCL20, prostaglandin | CCL20 (cytokine) and prostaglandin (pro-inflammatory mediator) involve in the recruitment and proliferation of Th17 cells;<br><br>Sphingosine-1-phosphate((human sequence-specific DNA binding protein) stimulates the production of CCL20+PGE2+S1P+ | Intestinal mucosa | Stimulated by ET-BSPs exosomes, may modulate E2-required proliferation of Th17 cells through the MyD88-mediated pathway and cause intestinal inflammation in IBD | Treatment | As a membrane carrier to involve in intracellular communication across species | [45] |
|-----------------------------------------------|------------------------------------------------------------------------------------------------------------------------------------------------------------------------------------------------------------------------------------------------------|-------------------|------------------------------------------------------------------------------------------------------------------------------------------------------------------|-----------|--------------------------------------------------------------------------------|------|

exosomes

|                      |                                                                                                    |                                               |                                                                                                                                                                                                                                               |           |                                                                                                |          |
|----------------------|----------------------------------------------------------------------------------------------------|-----------------------------------------------|-----------------------------------------------------------------------------------------------------------------------------------------------------------------------------------------------------------------------------------------------|-----------|------------------------------------------------------------------------------------------------|----------|
| Cholesterol          | A kind of lipid suppresses IBD inflammation or even inhibits pyroptosis signaling to alleviate IBD | —                                             | Inhibits pyroptosis signaling to ameliorate experimental colitis                                                                                                                                                                              | Treatment | Membrane carrier                                                                               | [46; 47] |
| Glucosylceramide     | A kind of lipid suppresses IBD inflammation                                                        | —                                             | Suppresses colon inflammation in IBD or bind with CD1 to inhibit activation of NK T cells in intestinal epithelium                                                                                                                            | Treatment | Membrane carrier                                                                               | [48; 49] |
| Lysophosphatic acid  | A kind of lipid activates proinflammatory mediators of IBD                                         | —                                             | Activates proinflammatory mediators in the arachidonic pathway in chronic colitis and down regulation of it may contribute to IBD therapy                                                                                                     | Treatment | Membrane carrier                                                                               | [46; 50] |
| Phosphatidylcholine  | A kind of lipid induces inflammation in UC                                                         | —                                             | Inhibitory effects of corticosteroid in patients with chronic steroid-refractory UC, or induce inflammation in UC and down regulation of it may contribute to IBD therapy                                                                     | Treatment | Membrane carrier                                                                               | [46; 51] |
| Sphingomyelin        | A kind of lipid alleviates inflammation                                                            | Mainly from B-lymphocyte                      | Modulates inflammation by activating peroxisome proliferator-activated receptor- $\gamma$ , and decreased exosomal sphingomyelin of it may activate cathepsin D as a mediator of apoptosis related to disruption of epithelial barrier in IBD | Treatment | Membrane carrier                                                                               | [46; 52] |
| Phosphatidylinositol | A kind of lipid                                                                                    | Mainly from B-lymphocytes, mast cells and DCs | Deficiency of exosomal phosphatidylinositol may protect against endoplasmic reticulum stress in IBD                                                                                                                                           | Treatment | Membrane carrier                                                                               | [46; 53] |
| Curcumin             | A polyphenol derived from the herbal remedy and dietary spice turmeric                             | Detected in milk                              | Alleviation of IBD                                                                                                                                                                                                                            | Treatment | Provides stability in PBS; Survives digestion and being easier to cross the intestinal barrier | [54]     |

Note: ANXA2, Annexin A2; ApoA-I, apolipoprotein A-I; CCL20, C-C motif chemokine 20; CD, crohn's disease;

circRNAs, circular RNAs; CLDN8, claudin-8; DC, dendritic cell; DSS, dextran sulfate sodium; EC, epithelial cell;

EGFR, epidermal growth factor receptor; ET-BSP, enterobacteria; GAS5, growth arrest-specific 5; HLA-G,

human leukocyte antigen-G; HSP, heat shock protein; IBD, inflammatory bowel disease; ICAM, intercellular adhesion molecule; IEC, intestinal epithelial cell; IFN- $\gamma$ , gamma interferon; IL, interleukin; KLF, Krüppel-like factor; lncRNA, long non-coding RNA; MAPK, mitogen-activated protein kinase; MDSC, myeloid-derived suppressor cell; miRNA, microRNA; MyD88, myeloid differentiation factor 88; NF- $\kappa$ B, nuclear factor-kappaB; NK, natural killer; PrPC, cellular prion protein; TJ, tight junction; Tregs, regulatory T cell; TG2, transglutaminase type 2; TNF, tumor necrosis factor; UC, ulcerative colitis; VSMCs, vascular smooth muscle cells

## References

- [1] L. Chen, W. Yang, Y. Guo, W. Chen, P. Zheng, J. Zeng, and W. Tong, Exosomal lncRNA GAS5 regulates the apoptosis of macrophages and vascular endothelial cells in atherosclerosis. *Plos One* 12 (2017) e0185406.
- [2] M. Lucafo, A. Di Silvestre, M. Romano, A. Avian, R. Antonelli, S. Martellosi, S. Naviglio, A. Tommasini, G. Stocco, A. Ventura, G. Decorti, and S. De Iudicibus, Role of the Long Non-Coding RNA Growth Arrest-Specific 5 in Glucocorticoid Response in Children with Inflammatory Bowel Disease. *Basic Clin Pharmacol Toxicol* 122 (2018) 87-93.
- [3] C. Wang, C. Zhang, L. Liu, A. Xi, B. Chen, Y. Li, and D. Jie, Macrophage-Derived mir-155-Containing Exosomes Suppress Fibroblast Proliferation and Promote Fibroblast Inflammation during Cardiac Injury. *Molecular Therapy the Journal of the American Society of Gene Therapy* 25 (2017) 192.
- [4] Y. Xu, B. Zhang, X. Zhu, C. Li, W. Song, and H. Tang, miR155-deficient alleviated intestinal inflammation by downregulating the development and function of CD103<sup>+</sup>CD11b<sup>+</sup>DC in the lamina propria of intestine. *The Journal of Immunology* 198 (2017) 62.8-62.8.
- [5] B. Zheng, W.N. Yin, T. Suzuki, X.H. Zhang, Z. Yu, L.L. Song, L.S. Jin, Z. Hong, Z. Hong, and J.S. Li, Exosome-Mediated miR-155 Transfer from Smooth Muscle Cells to Endothelial Cells Induces Endothelial Injury and Promotes Atherosclerosis. *Molecular Therapy the Journal of the American Society of Gene Therapy* 25 (2017) 1279.
- [6] M. Alexander, R. Hu, M.C. Runtsch, D.A. Kagele, T.L. Mosbrugger, T. Tolmachova, M.C. Seabra, J.L. Round, D.M. Ward, and R.M. O'Connell, Exosome-delivered microRNAs modulate the inflammatory response to endotoxin. *Nature Communications* 6 (2015) 7321.
- [7] T. Nata, M. Fujiya, N. Ueno, K. Moriichi, H. Konishi, H. Tanabe, T. Ohtake, K. Ikuta, and Y. Kohgo, MicroRNA-146b improves intestinal injury in mouse colitis by activating nuclear factor- $\kappa$ B and improving epithelial barrier function. *Journal of Gene Medicine* 15 (2013) 249-260.
- [8] T. Cooks, I.S. Pateras, L.M. Jenkins, K.M. Patel, A.I. Robles, J. Morris, T. Forshaw, E. Appella, V.G. Gorgoulis, and C.C. Harris, Mutant p53 cancers reprogram macrophages to tumor supporting macrophages via exosomal miR-1246. *Nature Communications* 9 (2018) 771.
- [9] G.W. Krissansen, Y. Yang, F.M. Mcqueen, E. Leung, D. Peek, Y.C. Chan, C. Print, N. Dalbeth, M.

- Williams, and A.G. Fraser, Overexpression of miR-595 and miR-1246 in the sera of patients with active forms of inflammatory bowel disease. *Inflammatory Bowel Diseases* 21 (2015) 520.
- [10] B. Lönnnerdal, X. Du, Y. Liao, and J. Li, Human milk exosomes resist digestion in vitro and are internalized by human intestinal cells. *Faseb Journal* 29 (1 supplement) (2015) 121.3.
- [11] T. Tian, Z. Yu, F. Xiao, S. Ye, W. Hao, W. Wu, W. Tan, C. Yu, J. Hu, and Z. Rong, MicroRNA-16 is putatively involved in the NF- $\kappa$ B pathway regulation in ulcerative colitis through adenosine A2a receptor (A2aAR) mRNA targeting. *Scientific Reports* 6 (2016) 30824.
- [12] T. Wolf, S.R. Baier, and J. Zemleni, The Intestinal Transport of Bovine Milk Exosomes Is Mediated by Endocytosis in Human Colon Carcinoma Caco-2 Cells and Rat Small Intestinal IEC-6 Cells. *Journal of Nutrition* 145 (2015) 2201-2206.
- [13] C.G. Chapman, and J. Pekow, The emerging role of miRNAs in inflammatory bowel disease: a review. *Therap Adv Gastroenterol* 8 (2015) 4-22.
- [14] N. Almási, A. Posa, A. Al-Awar, S. Török, Z. Murlasits, L.I. Nagy, L.G. Puskás, and K. Kupai, Differentially expressed microRNAs and their relation to gasotransmitters in TNBS-induced colitis in rat colon. *Academia Journal of Scientific Research* 5 (2018) 277-289.
- [15] M. Eoin, D. Viola, M. Joanne, B. Kelley, J. Paul, A. Carol, G. Mark, F. Glenn, and E. Holger, P-198 CCR2+ Inflammatory Monocytes Dictate the Course of Colonic Inflammation Via miR-223 Regulation of the NLRP3 Inflammasome. *Inflammatory Bowel Diseases* 20 Suppl 1 (2014) S105.
- [16] J. Li, M. Tan, Q. Xiang, Z. Zhou, and H. Yan, Thrombin-activated platelet-derived exosomes regulate endothelial cell expression of ICAM-1 via microRNA-223 during the thrombosis-inflammation response. *Thrombosis Research* 154 (2017) 96.
- [17] Y. Liao, X. Du, J. Li, and B. Lonnerdal, Human milk exosomes and their microRNAs survive digestion in vitro and are taken up by human intestinal cells. *Molecular nutrition & food research* 61 (2017).
- [18] F. Zaharie, M.S. Muresan, B. Petrushev, C. Berce, G.A. Gafencu, S. Selicean, A. Jurj, R. Cojocneanu-Petric, C.I. Lisencu, and L.A. Pop, Exosome-Carried microRNA-375 Inhibits Cell Progression and Dissemination via Bcl-2 Blocking in Colon Cancer. *Journal of Gastrointestinal & Liver Diseases Jgld* 24 (2015) 435.
- [19] W. Sakamoto, T. Masuno, H. Yokota, and T. Takizawa, Expression profiles and circulation dynamics of rat mesenteric lymph microRNAs. *Molecular Medicine Reports* 15 (2017) 1989-1996.
- [20] Z. Bian, L. Li, J. Cui, H. Zhang, Y. Liu, C.Y. Zhang, and Z. Ke, Role of miR-150-targeting c-Myb in colonic epithelial disruption during dextran sulphate sodium-induced murine experimental colitis and human ulcerative colitis. *Journal of Pathology* 225 (2011) 544-553.
- [21] Y.T. Fang, C.F. Lin, C.Y. Wang, R. Anderson, and Y.S. Lin, Interferon- $\gamma$  stimulates p11-dependent surface expression of annexin A2 in lung epithelial cells to enhance phagocytosis. *Journal of Cellular Physiology* 227 (2012) 2775-2787.
- [22] S. Tanida, T. Mizoshita, K. Ozeki, T. Katano, H. Kataoka, T. Kamiya, and T. Joh, Advances in refractory ulcerative colitis treatment: A new therapeutic target, Annexin A2. *World J Gastroenterol* 21 (2015) 8776-8786.
- [23] A. Zelante, R. Borgoni, C. Galuppi, V. Cifala, L. Melchiorri, S. Gullini, O. Baricordi, and R. Rizzo, Therapy modifies HLA-G secretion differently in Crohn's disease and ulcerative colitis patients. *Inflamm Bowel Dis* 17 (2011) E94-5.

- [24] V. Rebmann, L. Konig, S. Nardi, B. Wagner, L.F. Manvailer, and P.A. Horn, The Potential of HLA-G-Bearing Extracellular Vesicles as a Future Element in HLA-G Immune Biology. *Frontiers in immunology* 7 (2016) 173.
- [25] M. Burke, W. Choksawangkarn, N. Edwards, S. Ostrandrosenberg, and C. Fenselau, Exosomes from Myeloid-Derived Suppressor Cells Carry Biologically Active Proteins. *Journal of proteome research* 13 (2014) 836-43.
- [26] S.T. Leach, Z. Yang, I. Messina, C. Song, C.L. Geczy, A.M. Cunningham, and A.S. Day, Serum and mucosal S100 proteins, calprotectin (S100A8/S100A9) and S100A12, are elevated at diagnosis in children with inflammatory bowel disease. *Scandinavian journal of gastroenterology* 42 (2007) 1321-1331.
- [27] L. Diaz-Hidalgo, S. Altuntas, F. Rossin, M. D'Eletto, C. Marsella, M.G. Farrace, L. Falasca, M. Antonioli, G.M. Fimia, and M. Piacentini, Transglutaminase type 2-dependent selective recruitment of proteins into exosomes under stressful cellular conditions. *Biochimica et biophysica acta* 1863 (2016) 2084-92.
- [28] L. Elli, M.M. Ciulla, G. Busca, L. Roncoroni, C. Maioli, S. Ferrero, M.T. Bardella, A. Bonura, R. Paliotti, C. Terrani, and P. Braidotti, Beneficial effects of treatment with transglutaminase inhibitor cystamine on the severity of inflammation in a rat model of inflammatory bowel disease. *Laboratory investigation; a journal of technical methods and pathology* 91 (2011) 452-61.
- [29] N. De Silva, M. Samblas, J.A. Martinez, and F.I. Milagro, Effects of exosomes from LPS-activated macrophages on adipocyte gene expression, differentiation, and insulin-dependent glucose uptake. *Journal of physiology and biochemistry* 74 (2018) 559-568.
- [30] J. Caradec, G. Kharmate, E. Hosseini-Beheshti, H. Adomat, M. Gleave, and E. Guns, Reproducibility and efficiency of serum-derived exosome extraction methods. *Clinical biochemistry* 47 (2014) 1286-92.
- [31] H. Ryu, E. Gounaris, M. Kron, C. Waltenbaugh, Z.J. Zhang, and T.A. Barrett, Novel Pathway for TNF-Mediated Albumin Losses in IBD. *Gastroenterology* 140 (2011) S-502-S-502.
- [32] K. Assi, S. Patterson, D.A. Owen, S. Dedhar, M.K. Levings, and B. Salh, Integrin-Linked Kinase Promotes Colitis Through Regulation of CCL2, Fibronectin and Regulatory T Cells. *Gastroenterology* 140 (2011) S-636-S-636.
- [33] A. Purushothaman, S.K. Bandari, J. Liu, J.A. Mobley, E.E. Brown, and R.D. Sanderson, Fibronectin on the Surface of Myeloma Cell-derived Exosomes Mediates Exosome-Cell Interactions. *The Journal of biological chemistry* 291 (2016) 1652-63.
- [34] I. Kurose, S. Miura, M. Suematsu, H. Serizawa, F. Dai, H. Asako, T. Hibi, and M. Tsuchiya, Tissue-type plasminogen activator of colonic mucosa in ulcerative colitis. *Digestive Diseases & Sciences* 37 (1992) 307-11.
- [35] K. Al-Nedawi, J. Szemraj, and C.S. Cierniewski, Mast cell-derived exosomes activate endothelial cells to secrete plasminogen activator inhibitor type 1. *Arteriosclerosis, thrombosis, and vascular biology* 25 (2005) 1744-9.
- [36] A.T. Xu, J.T. Lu, Z.H. Ran, and Q. Zheng, Exosome in intestinal mucosal immunity. *Journal of gastroenterology and hepatology* 31 (2016) 1694-1699.
- [37] Z. Li, M. Zhuang, L. Zhang, X. Zheng, P. Yang, and Z. Li, Acetylation modification regulates GRP78 secretion in colon cancer cells. *Scientific Reports* 6 (2016) 30406.
- [38] I. Das, C.W. Png, I. Oancea, S.Z. Hasnain, R. Lourie, M. Proctor, R.D. Eri, Y. Sheng, D.I. Crane, T.H. Florin, and M.A. McGuckin, Glucocorticoids alleviate intestinal ER stress by enhancing protein



- folding and degradation of misfolded proteins. *The Journal of experimental medicine* 210 (2013) 1201-16.
- [39] C. Robertson, S.A. Booth, D.R. Beniac, M.B. Coulthart, T.F. Booth, and A. McNicol, Cellular prion protein is released on exosomes from activated platelets. *Blood* 107 (2006) 3907-11.
- [40] C.S. Petit, F. Barreau, L. Besnier, P. Gandille, B. Riveau, D. Chateau, M. Roy, D. Berrebi, M. Svrcek, P. Cardot, M. Rousset, C. Clair, and S. Thenet, Requirement of cellular prion protein for intestinal barrier function and mislocalization in patients with inflammatory bowel disease. *Gastroenterology* 143 (2012) 122-32 e15.
- [41] S. Da Silva, A.V. Keita, S. Mohlin, S. Pahlman, V. Theodorou, I. Pahlman, J.P. Mattson, and J.D. Soderholm, A Novel Topical PPARgamma Agonist Induces PPARgamma Activity in Ulcerative Colitis Mucosa and Prevents and Reverses Inflammation in Induced Colitis Models. *Inflamm Bowel Dis* 24 (2018) 792-805.
- [42] C. Looze, D. Yui, L. Leung, M. Ingham, M. Kaler, X. Yao, W.W. Wu, R.F. Shen, M.P. Daniels, and S.J. Levine, Proteomic Profiling of Human Plasma Exosomes Identifies PPAR $\gamma$  as an Exosome-associated Protein. *Biochem Biophys Res Commun* 378 (2009) 433-438.
- [43] P. Samborski, and M. Grzymislowski, The Role of HSP70 Heat Shock Proteins in the Pathogenesis and Treatment of Inflammatory Bowel Diseases. *Advances in clinical and experimental medicine : official organ Wroclaw Medical University* 24 (2015) 525-30.
- [44] A. Asea, M. Rehli, E. Kabingu, J.A. Boch, O. Baré, P.E. Auron, M.A. Stevenson, and S.K. Calderwood, Novel Signal Transduction Pathway Utilized by Extracellular HSP70 ROLE OF TOLL-LIKE RECEPTOR (TLR) 2 AND TLR4. *Journal of Biological Chemistry* 277 (2002) 15028-15034.
- [45] Z. Deng, J. Mu, M. Tseng, B. Wattenberg, X. Zhuang, N.K. Egilmez, Q. Wang, L. Zhang, J. Norris, and H. Guo, Enterobacteria-secreted particles induce production of exosome-like S1P-containing particles by intestinal epithelium to drive Th17-mediated tumorigenesis. *Nature Communications* 6 (2015) 6956.
- [46] T. Skotland, K. Sandvig, and A. Llorente, Lipids in exosomes: Current knowledge and the way forward. *Progress in Lipid Research* 66 (2017) 30.
- [47] Y. Xiong, Y. Lou, H. Su, Y. Fu, and J. Kong, Cholecalciferol cholesterol emulsion ameliorates experimental colitis via down-regulating the pyroptosis signaling pathway. *Experimental & Molecular Pathology* 100 (2016) 386-392.
- [48] K. Arai, Y. Mizobuchi, Y. Tokuji, K. Aida, S. Yamashita, M. Ohnishi, and M. Kinoshita, Effects of Dietary Plant-Origin Glucosylceramide on Bowel Inflammation in DSS-Treated Mice. *Journal of Oleo Science* 64 (2015) 737-742.
- [49] L.J. Saubermann, P. Beck, Y.P. De Jong, R.S. Pitman, M.S. Ryan, H.S. Kim, M. Exley, S. Snapper, S.P. Balk, S.J. Hagen, O. Kanauchi, K. Motoki, T. Sakai, C. Terhorst, Y. Koezuka, D.K. Podolsky, and R.S. Blumberg, Activation of natural killer T cells by alpha-galactosylceramide in the presence of CD1d provides protection against colitis in mice. *Gastroenterology* 118 (2000) 119-128.
- [50] H.C. Rath, A. Sturm, I. Melchner, J. Schoelmerich, and A.U. Dignass, Proinflammatory effect of lysophosphatic acid on chronic colitis in two animal models of inflammatory bowel disease. *Gastroenterology* 118 (2000) A1365-A1365.
- [51] W. Stremmel, U. Merle, A. Zahn, F. Autschbach, U. Hinz, and R. Ehehalt, Retarded release phosphatidylcholine benefits patients with chronic active ulcerative colitis. *Gut* 54 (2005) 966-71.
- [52] A. Fischbeck, K. Leucht, I. Freywagner, S. Bentz, T. Pesch, S. Kellermeier, M. Krebs, M. Fried, G.

Rogler, and M. Hausmann, Sphingomyelin induces cathepsin D-mediated apoptosis in intestinal epithelial cells and increases inflammation in DSS colitis. *Gastroenterology* 138 (2011) S-132-S-132.

[53] Phosphatidylinositol signalling defects implicated in IBD. *Disease Models & Mechanisms* 7 (2014) 1.

[54] M. Vashisht, P. Rani, S.K. Onteru, and D. Singh, Curcumin Encapsulated in Milk Exosomes Resists Human Digestion and Possesses Enhanced Intestinal Permeability in Vitro. *Appl Biochem Biotechnol* 183 (2017) 993-1007.
